# Supplementary material for: Continuous-flow retro-Diels–Alder reaction: an efficient method for the preparation of pyrimidinone derivatives
Source: publisher site journal article supplement (doi:10.3762/bjoc.14.20), 2018-02-01
Supplement: Additional file 1 [file 1860-5397-14-20-S1.pdf]

# Supporting Information

## for

# Continuous flow retro-Diels–Alder reaction: an efficient method for the preparation of pyrimidinone derivatives

Imane Nekkaa<sup>1</sup>, Márta Palkó<sup>1</sup>, István M. Mándity<sup>1</sup>, and Ferenc Fülöp<sup>\*1,2</sup>

Address: <sup>1</sup>Institute of Pharmaceutical Chemistry, University of Szeged, Eötvös u. 6, H-6720 Szeged, Hungary, and <sup>2</sup>MTA-SZTE Stereochemistry Research Group, Hungarian Academy of Sciences, Eötvös u. 6, H-6720 Szeged, Hungary

Email: Ferenc Fülöp\* - fulop@pharm.u-szeged.hu

\*Corresponding author

## Experimental procedures and analytical data

### Contents

|                                                                              |     |
|------------------------------------------------------------------------------|-----|
| 1. Experimental procedures.....                                              | S2  |
| 1.1. General information.....                                                | S2  |
| 1.2. Procedures for the synthesis of the starting materials <b>1–8</b> ..... | S2  |
| 1.3. General reactor set-up for continuous-flow reactions.....               | S2  |
| 1.4. Additional table .....                                                  | S3  |
| 1.5. Syntheses and analytical data of the rDA Products <b>9–14</b> .....     | S4  |
| 1.6. Desulfurisation reaction of <b>8b</b> .....                             | S23 |
| 1.6.1. Alternative batch synthesis of <b>15b</b> .....                       | S26 |
| 2. References .....                                                          | S26 |

## 1. Experimental procedures

### 1.1. General information

$^1\text{H}$  NMR spectra were recorded at 400.13 MHz or 500.20 MHz and the  $^{13}\text{C}$ -NMR spectra were recorded at 100.62 MHz or 125.77 MHz in  $\text{CDCl}_3$  at ambient temperature, with a Bruker AM 400 or Bruker Ascend<sup>TM</sup> 500 spectrometer. Chemical shifts are given in (ppm) relative to TMS as the internal standard. In the  $^1\text{H}$  NMR spectra, signal positions ( $\delta$ ) are given in parts per million (ppm) from tetramethylsilane ( $\delta = 0$ ) and were measured relative to residual solvent signal ( $\text{CDCl}_3 = 7.26$  ppm).  $^{13}\text{C}$  NMR spectra were recorded using the same spectrometers. Signal positions ( $\delta$ ) are given in parts per million (ppm) from tetramethylsilane ( $\delta = 0$ ) and were measured relative to the signal of  $\text{CDCl}_3$  ( $\delta = 77.16$  ppm). The multiplicities of signals are given as s = singlet, d = doublet, t = triplet, q = quadruplet, m = multiplet, ArH = aromatic. Coupling constants ( $J$ ) are reported to the nearest 0.1 Hz. HPLC–MS measurements were performed with a Phenomenex 5  $\mu\text{m}$  C18(2) 100 Å column (250  $\times$  4.60 mm). The solvent system consisted of AcOH (0.1%) in water (A), AcOH (0.1%) in MeCN (B); gradient: 5%–100% B over 35 min, at a flow rate of 1 mL  $\text{min}^{-1}$ . Chromatograms and spectra were recorded in positive ionization mode with electrospray ionization on a Thermo LCQ Fleet mass spectrometer. FTIR spectrum was obtained from KBr pellet on a Perkin-Elmer 100 FTIR spectrometer.

### 1.2. Procedures for the synthesis of the starting materials 1–8

Starting materials **1–8** were synthesized in our previous work by the cyclization of the di-*exo*- or di-*endo*-norbornene- $\beta$ -amino acids or esters with ethyl *p*-chlorobenzimidate resulting in tricyclic pyrimidinones **1**, **2a** and **2b** [1-4]. Methanopyrrolo-, methanopyrido- and methanoazepino[2,1-*b*]-quinazolinones **3–6** were prepared from di-*exo*-norbornene-fused azetidinone with lactim ethers by ring enlargement [5]. For the preparation of 2-thioxo-pyrimidinones **7**, **8a** and **8b**, the most common method is the reaction of the appropriate amino esters with phenyl isothiocyanate, followed by cyclization of the resulting thiourea with hydrogen chloride under reflux [1,4,6].

### 1.3. General reactor set-up for continuous-flow reactions

The modular flow system was equipped with a heated 304 stainless steel tubing coil with 14 mL internal volume [Supelco premium grade 304 empty stainless steel tubing; dimensions: length (L)  $\times$  outer diameter (OD)  $\times$  inner diameter (ID) = 100 ft  $\times$

1/16 in x 0.03 in; product reference number: 20553] and an adjustable back-pressure regulator (ThalesNano, BPR, 0–300 bar). The tube reactor was heated in a Heraeus oven to the desired temperature. Solutions of the starting materials **1–8** (0.1 mmol) were loaded into the reactor via an HPLC pump. The residence time was measured according to literature methods [7]. The resulting products **9–14** were identified by means of HPLC–MS,  $^1\text{H}$  NMR and  $^{13}\text{C}$  NMR spectroscopic analysis without the need for further purification steps. All physical and spectroscopic data of pyrimidinones **9–14** were identical with their literature data [1-6].

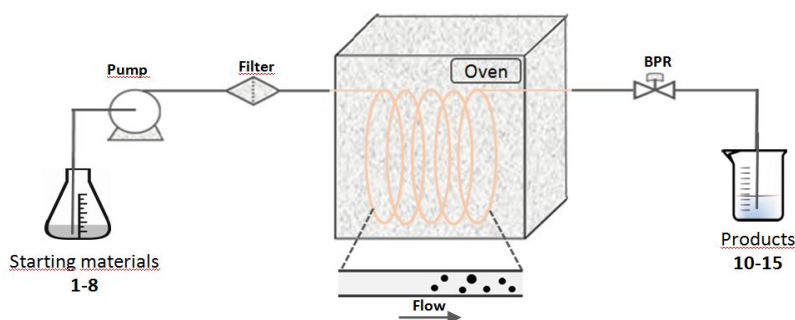

**Figure 1:** Schematic outline of the continuous flow reactor.

#### 1.4. Additional Table

**Table S1:** Operating conditions for the rDA reactions in the CF reactor

| Entry     | Product    | Continuous flow in the present work |           |                      |                                   |                        |
|-----------|------------|-------------------------------------|-----------|----------------------|-----------------------------------|------------------------|
|           |            | Solvent                             | Temp [°C] | Residence time [min] | Flow rate [mL min <sup>-1</sup> ] | Yield <sup>b</sup> [%] |
| <b>1</b>  | <b>9</b>   | MeCN                                | 250       | 15                   | 0.5                               | 92                     |
| <b>2a</b> | <b>9</b>   |                                     | 250       | 10                   |                                   | 95                     |
| <b>2b</b> | <b>9</b>   | Toluene                             | 230       | 30                   |                                   | 93                     |
| <b>3</b>  | <b>10</b>  | MeOH                                | 130       | 10                   |                                   | 95                     |
| <b>4</b>  | <b>11</b>  |                                     | 150       | 10                   |                                   | 97                     |
| <b>5</b>  | <b>12</b>  |                                     | 120       | 10                   |                                   | 95                     |
| <b>6</b>  | <b>13</b>  |                                     | 130       | 10                   |                                   | 94                     |
| <b>7</b>  | <b>14</b>  | MeCN                                | 210       | 15                   |                                   | 96                     |
| <b>8a</b> | <b>14</b>  |                                     | 220       | 10                   |                                   | 96                     |
| <b>8b</b> | <b>14</b>  |                                     | 250       | 30                   |                                   | 30 <sup>a</sup>        |
| <b>8b</b> | <b>15b</b> | EtOH/H <sub>2</sub> O = 2:1         | 250       | 30                   |                                   | 90                     |

<sup>a</sup>After column chromatography

<sup>b</sup>Isolated yield

## 1.5. Syntheses and analytical data of rDA products 9–14

### 2-(4-Chlorophenyl)-3*H*-pyrimidin-4-one (**9**)

Synthesized from starting materials **1** (Method A), **2a** (Method B) and **2b** (Method C).

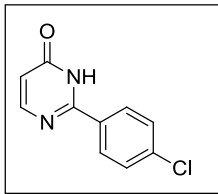

#### Method A

Di-*exo*-2-(4-chlorophenyl)tetrahydro-5,8-methano-4(3*H*)-quinazoline (**1**, 0.1 mmol) was dissolved in 10 mL of acetonitrile (MeCN). The system temperature was set to 250 °C, the pressure to 10 bar and the flow rate to 0.5 mL min<sup>-1</sup>. When the pressure and the temperature of the flow system were stable, the solution loaded into the reactor passed through the heated reactor coil within a residence time of 15 min and the flow output was collected. The solvent was removed by evaporation and the resulting product **9** was analysed by means of HPLC-MS, <sup>1</sup>H NMR and <sup>13</sup>C NMR spectroscopy and obtained in a good yield and with high purity. (**9**, m.p. 243-245 °C, yield = 92%).

#### Method B

Di-*endo*-2-(4-chlorophenyl)tetrahydro-5,8-methano-4(3*H*)-quinazoline (**2a**, 0.1mmol) was dissolved in MeCN (6 mL) and reacted at 250 °C with a flow rate of 0.5 mL min<sup>-1</sup> corresponding to a residence time of 10 min. Product **9** was obtained by applying the same procedure used above, in a good yield and with high purity (**9**, m.p. 243-245 °C, yield = 95%).

#### Method C

Di-*endo*-2-(4-chlorophenyl)tetrahydro-5,8-ethano-4(3*H*)-quinazoline (**2b**, 0.01mmol) dissolved in toluene (15 mL) was introduced into the flow reactor at a decreased temperature of 230 °C while using the same flow rate (0.5 mL min<sup>-1</sup>). The product mixture (brownish-yellow colour) leaving the flow system was collected and analysed by means of HPLC–MS spectroscopy. Based on the result obtained, **2b** showed a moderate conversion to **9**. Therefore, in order to get the complete conversion, we recycled the flow output twice. Product **9** was obtained within an overall residence

time of 30 min (**9**, m.p. 243-245 °C, yield = 93%). Spectroscopic data of **9** are in agreement with literature data [2-5].

$^1\text{H}$  NMR (400.1 MHz,  $\text{CDCl}_3$ )  $\delta_{\text{H}}$ : 6.45 (d, 1H, CH,  $J = 6.5$  Hz), 7.53 (d, 2H, ArH,  $J = 8.5$  Hz), 8.12–8.14 (m, 3H), 12.54 (s, 1H, NH).

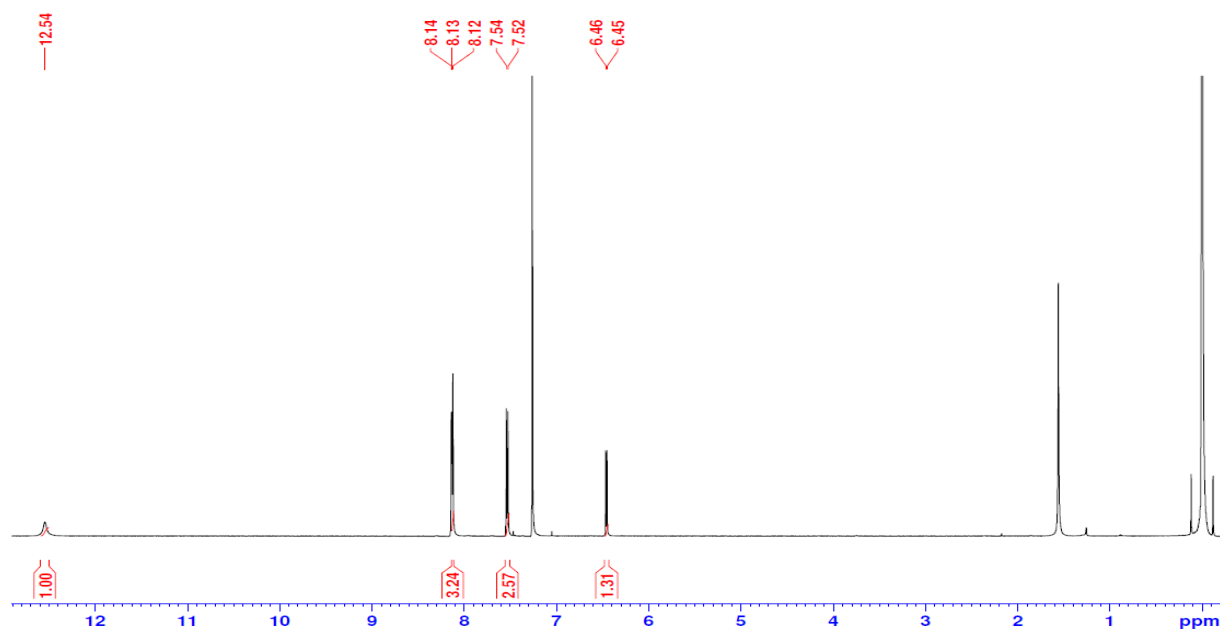

$^{13}\text{C}$  NMR (100.6 MHz,  $\text{CDCl}_3$ ):  $\delta_{\text{C}}$  = 113.84, 129.07, 129.45, 130.15, 138.81, 155.45, 156.65, 164.95.

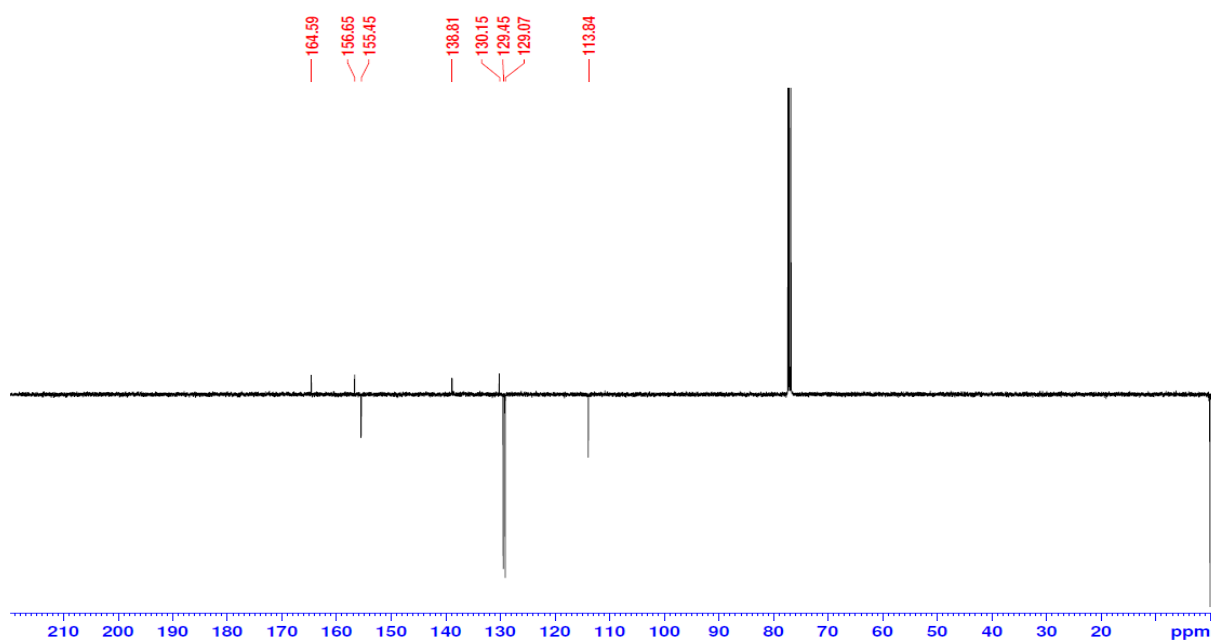

HPLC-MS characterization: The following retention time and molecular weight were determined: **9**: {RT= 15.16, m/z = 207 [M + H]<sup>+</sup> }.

RT: 0.00 - 25.00

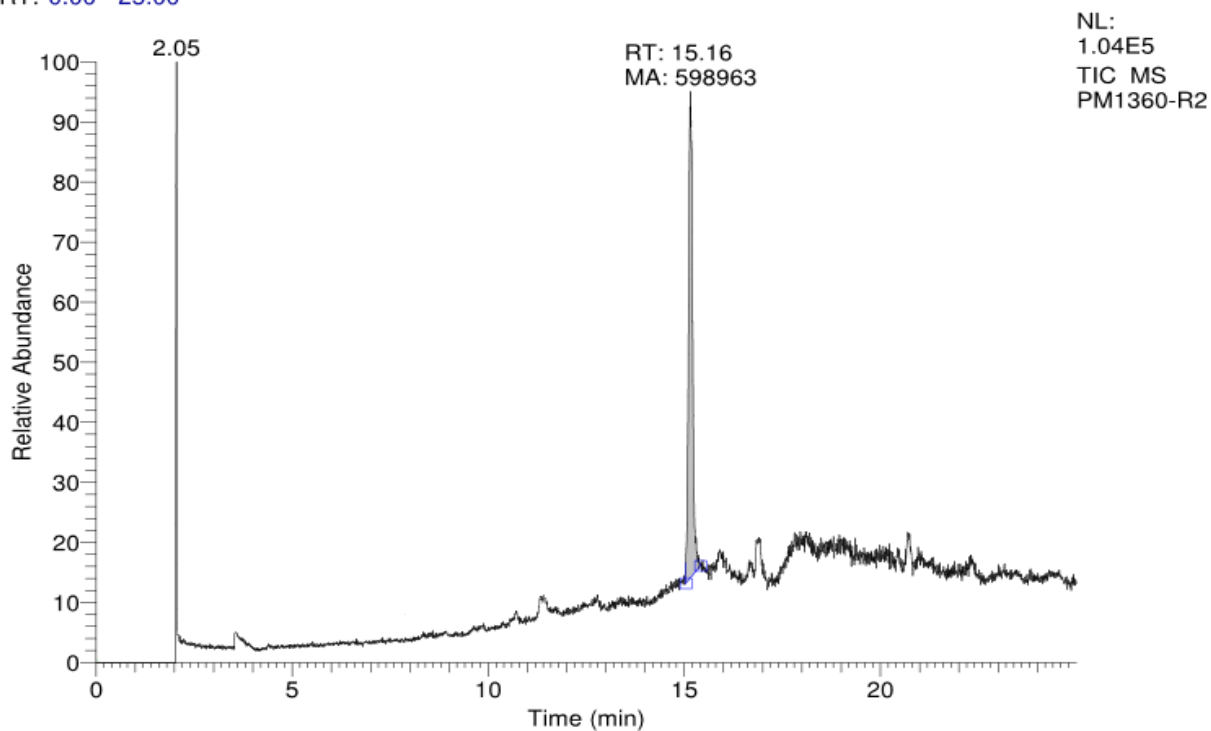

PM1360-R2 #2048 RT: 15.15 AV: 1 NL: 3.93E4  
T: ITMS + c ESI Full ms [50.00-2000.00]

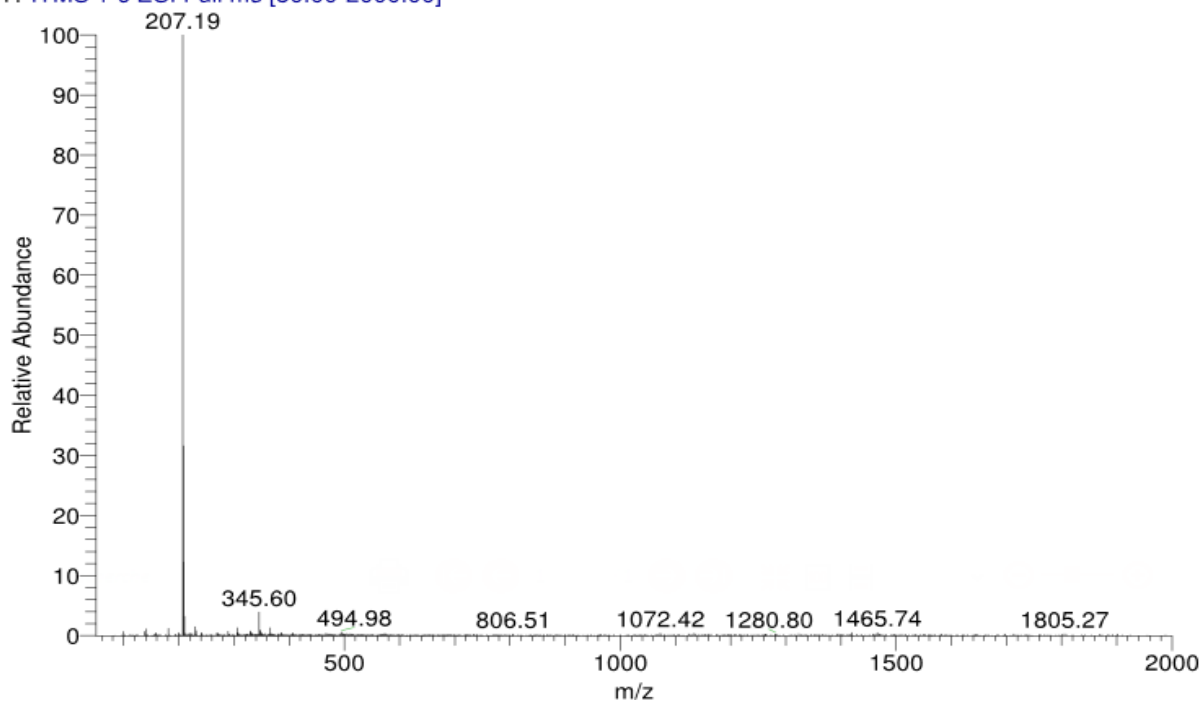

### 7,8-Dihydropyrrolo[1,2-a]pyrimidin-4(6H)-one (**10**):

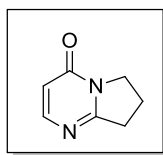

Di-exo-hexahydro-5,8-methanopyrrolo[2,1-*b*]quinazolin-9(1*H*)-one (**3**, 0.1 mmol) was dissolved in methanol (MeOH, 6 mL). The system temperature was set to 130 °C otherwise using the same pressure and flow rate as in previous procedures (10 bar, 0.5 mL min<sup>-1</sup>). The solution fed into the reactor passed through the heated reactor coil within a residence time of 10 min and the flow output was collected. The solvent was removed by evaporation and the resulting product **10** was analysed and obtained in a nearly quantitative yield and with high purity (**10**, yield = 95%). Spectroscopic data are in agreement with the literature data [5].

<sup>1</sup>H NMR (400.1 MHz, CDCl<sub>3</sub>) δ<sub>H</sub>: 2.23–2.29 (m, 2H, CH<sub>2</sub>), 3.12–3.15 (t, 2H, CH<sub>2</sub> *J* = 7.6 Hz), 4.15–4.17 (t, 2H, CH<sub>2</sub> *J* = 7.6 Hz), 6.28 (d, 1H, CH, *J* = 7.6 Hz), 7.86 (d, 1H, CH, *J* = 6.6 Hz).

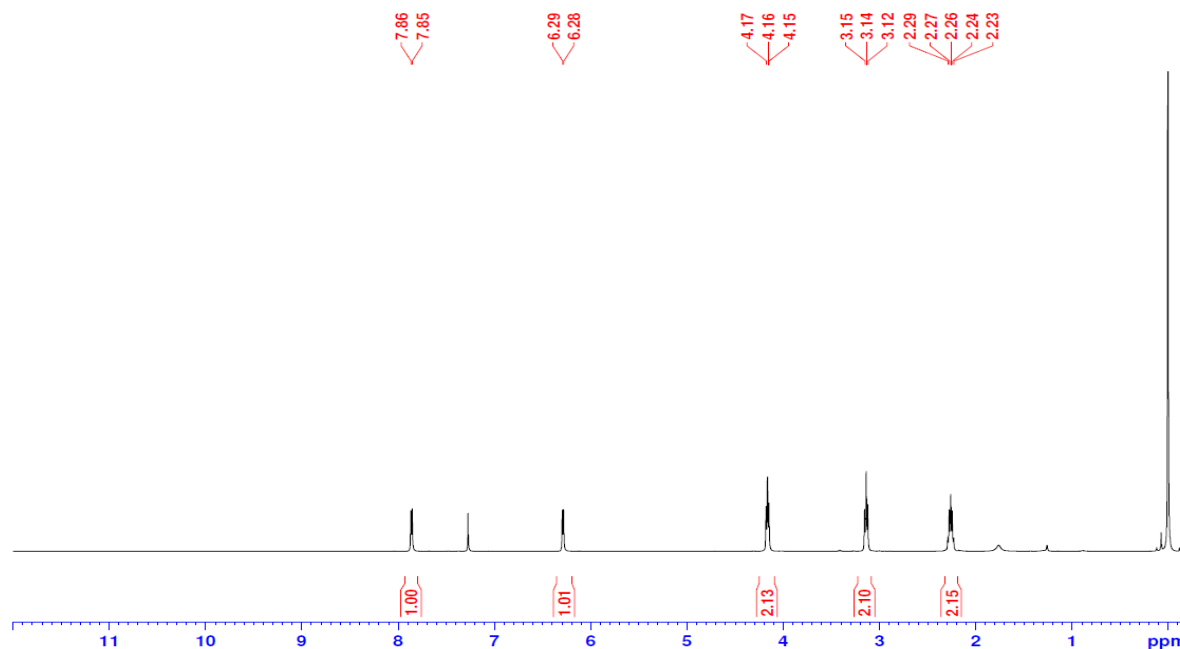

$^{13}\text{C}$  NMR (100.6 MHz,  $\text{CDCl}_3$ ):  $\delta_{\text{C}}$  = 18.90, 32.74, 47.01, 112.71, 154.15, 161.35, 164.73.

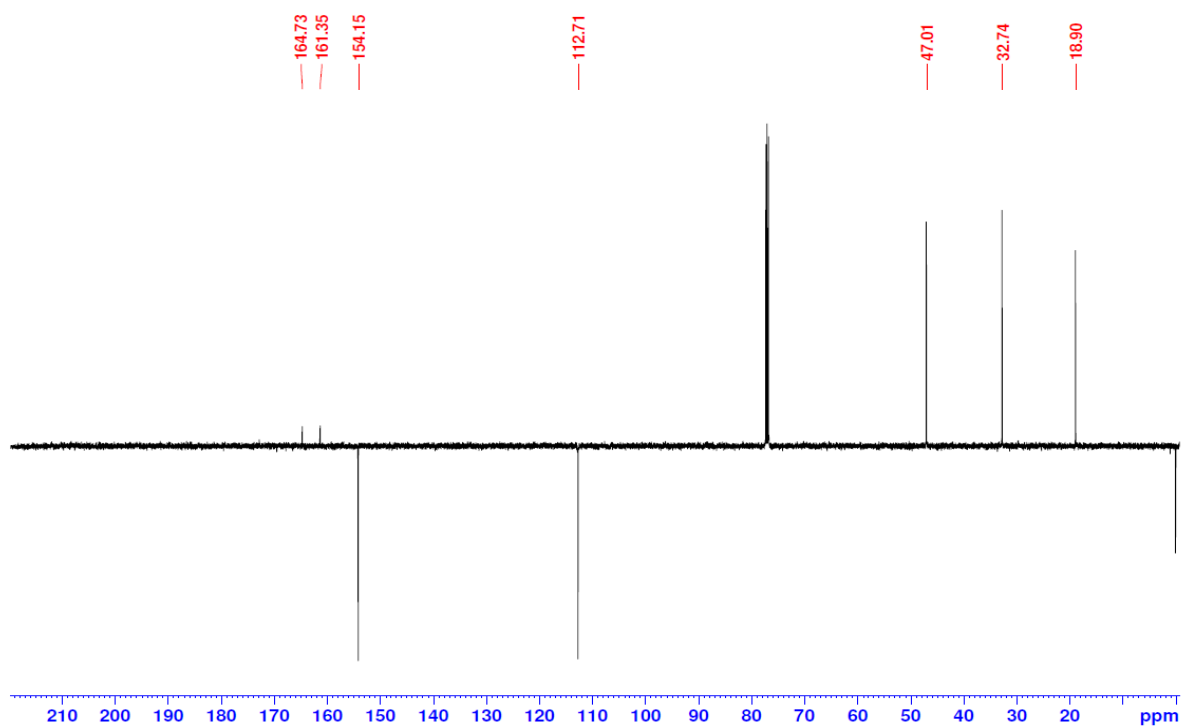

HPLC-MS characterization: The following retention time and molecular weight were determined: **10**: {RT= 2.60, m/z = 137 [M + H]<sup>+</sup> }.

RT: 0.00 - 20.00

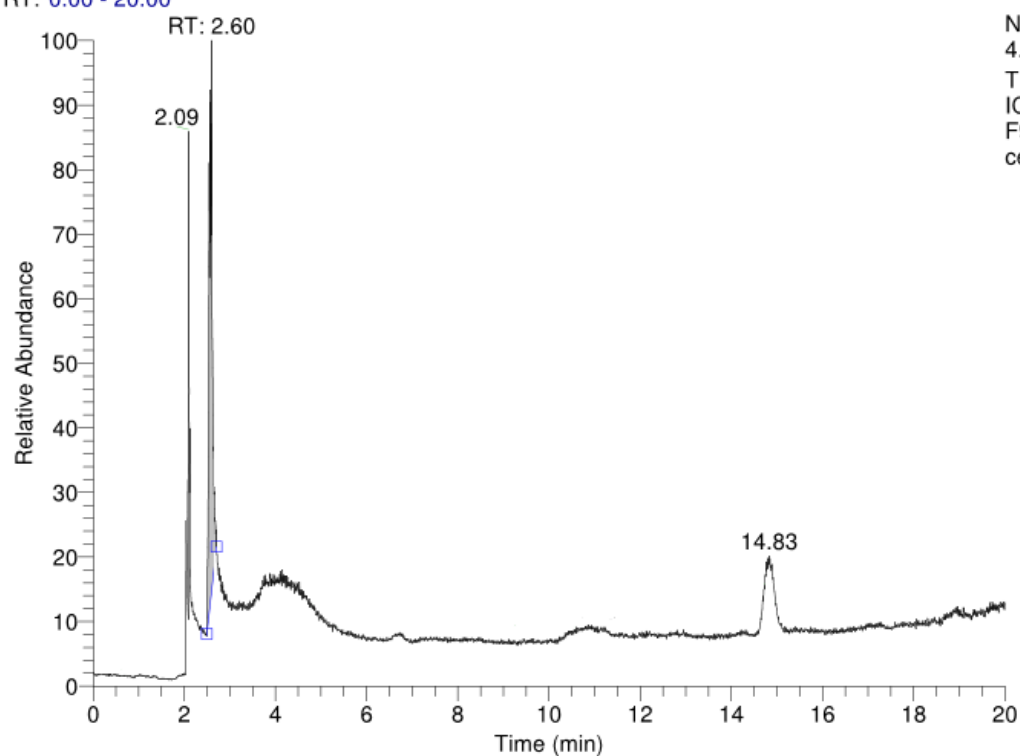

F90-R1-celui la #358 RT: 2.57 AV: 1 NL: 2.75E5

T: ITMS + c ESI Full ms [50.00-2000.00]

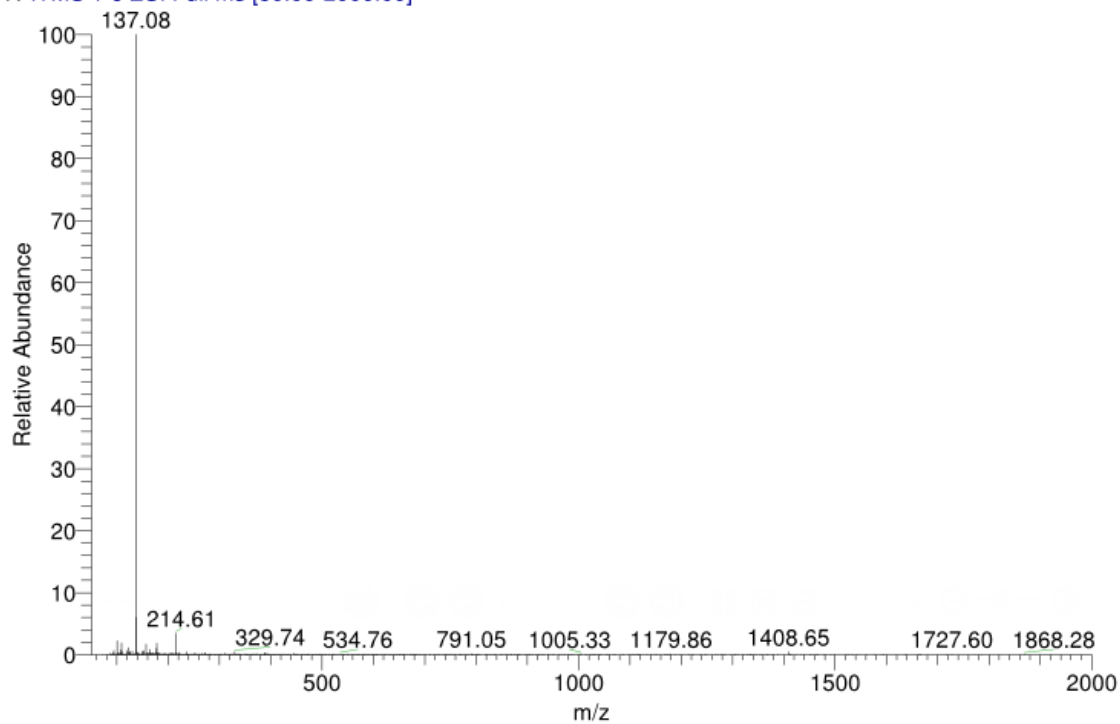

## 6-Methyl-7,8-dihydropyrrolo[1,2-a]pyrimidin-4(6H)-one (**11**)

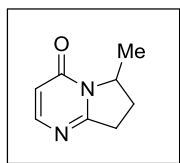

1-Methyl-hexahydro-5,8-methanopyrrolo[2,1-*b*]quinazolin-9(1*H*)-one (**4**, 0.1 mmol) was dissolved in MeOH (6 mL) at 150 °C, pressure = 10 bar, flow rate = 0.5 mL min<sup>-1</sup>. The solution fed into the reactor passed through the heated reactor coil within a residence time of 10 min and the flow output was collected. The solvent was removed by evaporation and the resulting product **11** was analysed and obtained in a high yield and with high purity (**11**, yield = 97%).

Spectroscopic data are in agreement with the literature data [5].

<sup>1</sup>H NMR (400.1 MHz, CDCl<sub>3</sub>) δ<sub>H</sub>: 1.47 (d, 3H, CH<sub>3</sub>, *J* = 6.5 Hz), 1.86–2.44 (m, 2H, CH<sub>2</sub>), 2.79–3.26 (m, 2H, CH<sub>2</sub>), 4.77–4.84 (m, 1H, CH), 6.26 (d, 1H, CH, *J* = 6.6 Hz), 7.83 (d, 1H, CH, *J* = 6.4 Hz).

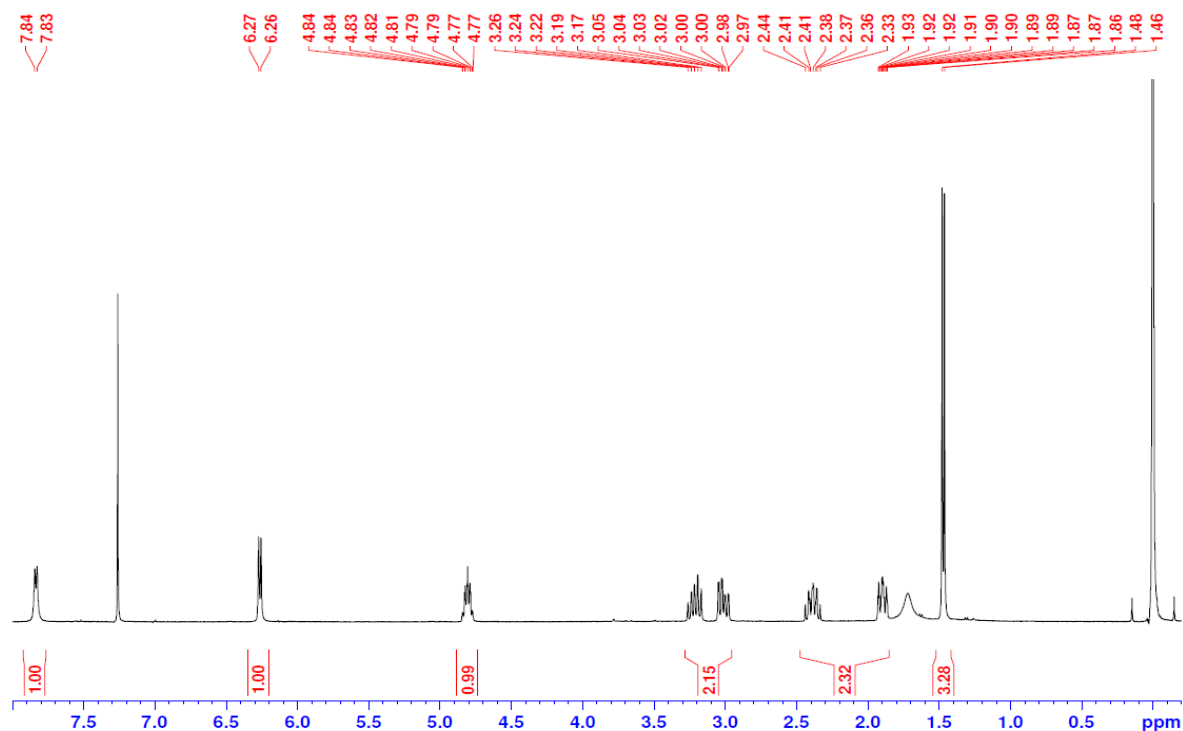

$^{13}\text{C}$  NMR (100.6 MHz,  $\text{CDCl}_3$ ):  $\delta_{\text{C}}$  = 18.72, 26.78, 31.01, 55.96, 113.30, 154.03, 161.08, 164.20.

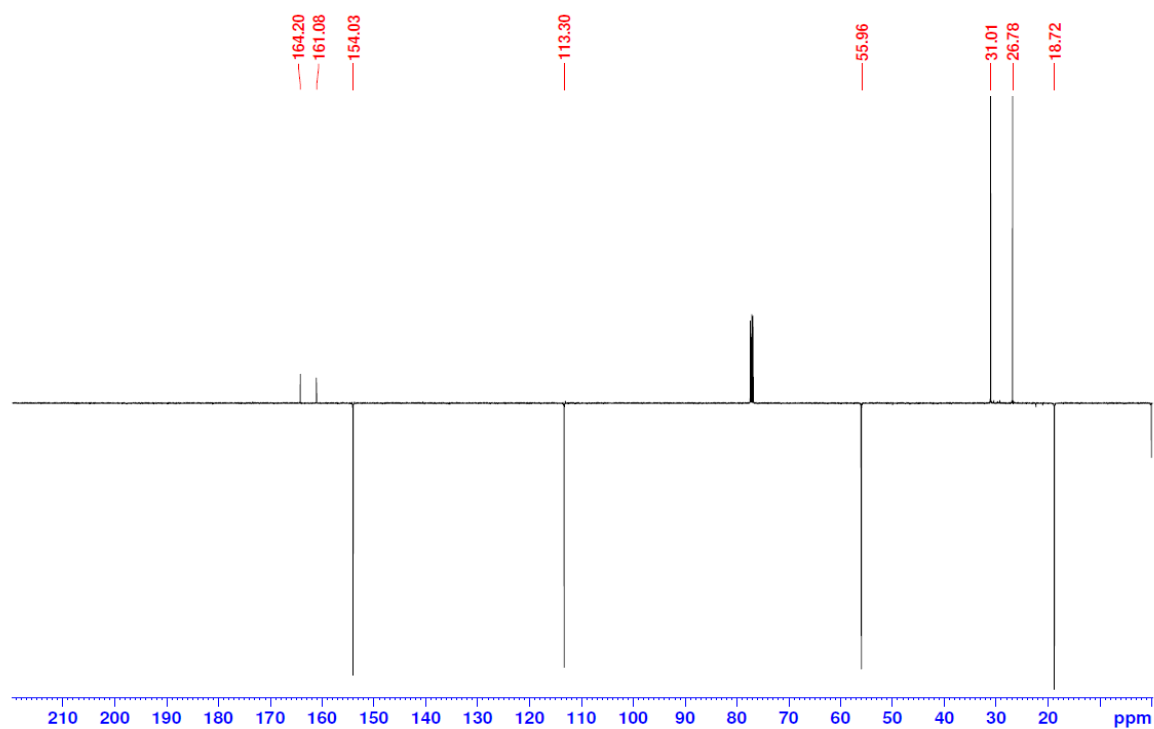

HPLC-MS characterization: The following retention time and molecular weight were determined: **11**: {RT= 2.96, m/z = 151 [M + H]<sup>+</sup> }.

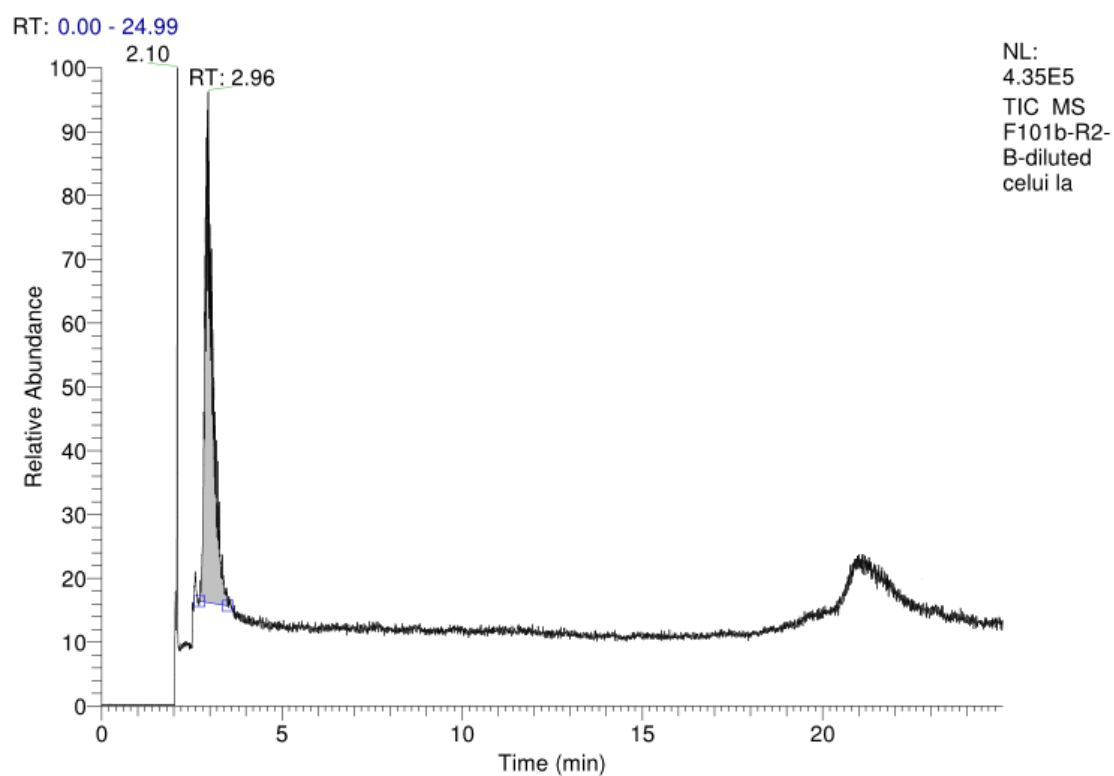

F101b-R2-B-diluted celui la #383-513 RT: 2.76-3.41 AV: 131 NL: 1.32E5  
T: ITMS + c ESI Full ms [50.00-2000.00]

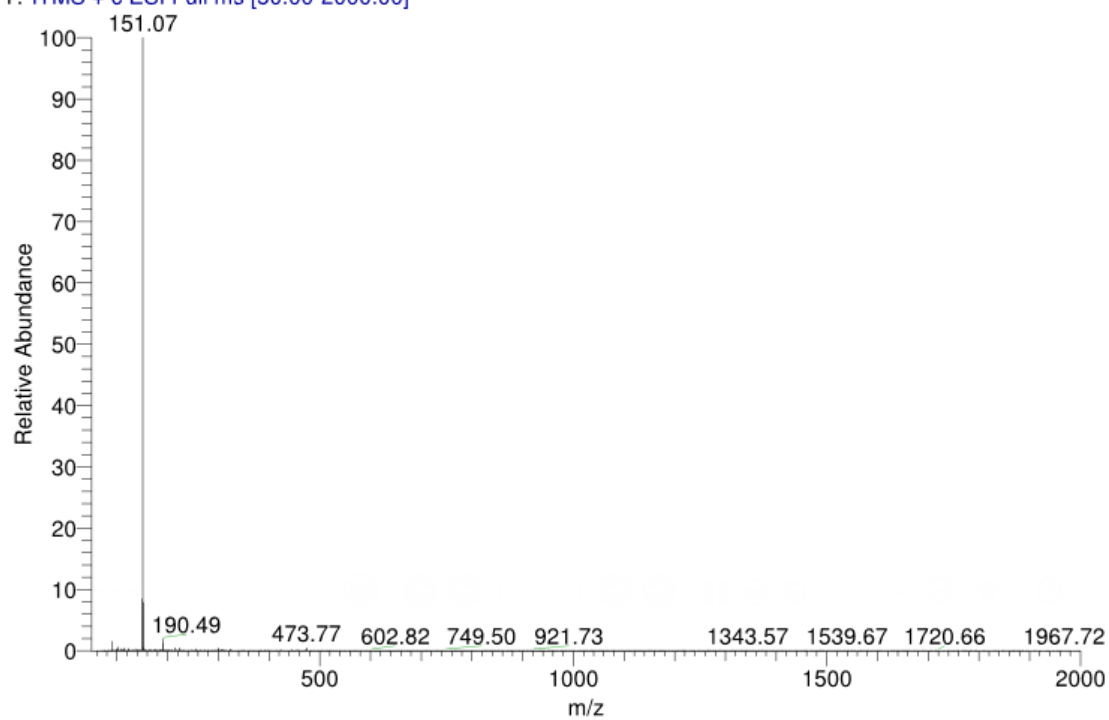

**6,7,8,9-Tetrahydropyrido[1,2-*a*]pyrimidin-4(4*H*)-one (12):**

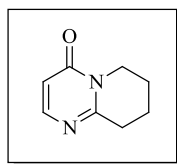

1,4-Hexahydromethanopyrido[2,1-*b*]quinazolin-11(11*aH*)-one (**5**, 0.1 mmol) was dissolved in MeOH (6 mL) at 120 °C, pressure = 10 bar, flow rate = 0.5 mL min<sup>-1</sup>. The solution fed into the reactor passed through the heated reactor coil within a residence time of 10 min and the flow output was collected. The MeOH was removed by evaporation and the resulting product **12** was analysed and obtained in a high yield and with high purity (**12**, yield = 95%). Spectroscopic data are in agreement with the literature data [5].

<sup>1</sup>H NMR (400.1 MHz, CDCl<sub>3</sub>) δ<sub>H</sub>: 1.88–2.01 (m, 4H, CH<sub>2</sub>), 2.91–2.94 (t, 2H, CH<sub>2</sub>, *J* = 6.6 Hz), 3.95–3.98 (t, 2H, CH<sub>2</sub> *J* = 6.6 Hz), 6.31 (d, 1H, CH, *J* = 6.5 Hz), 7.81 (d, 1H, CH, *J* = 6.5 Hz).

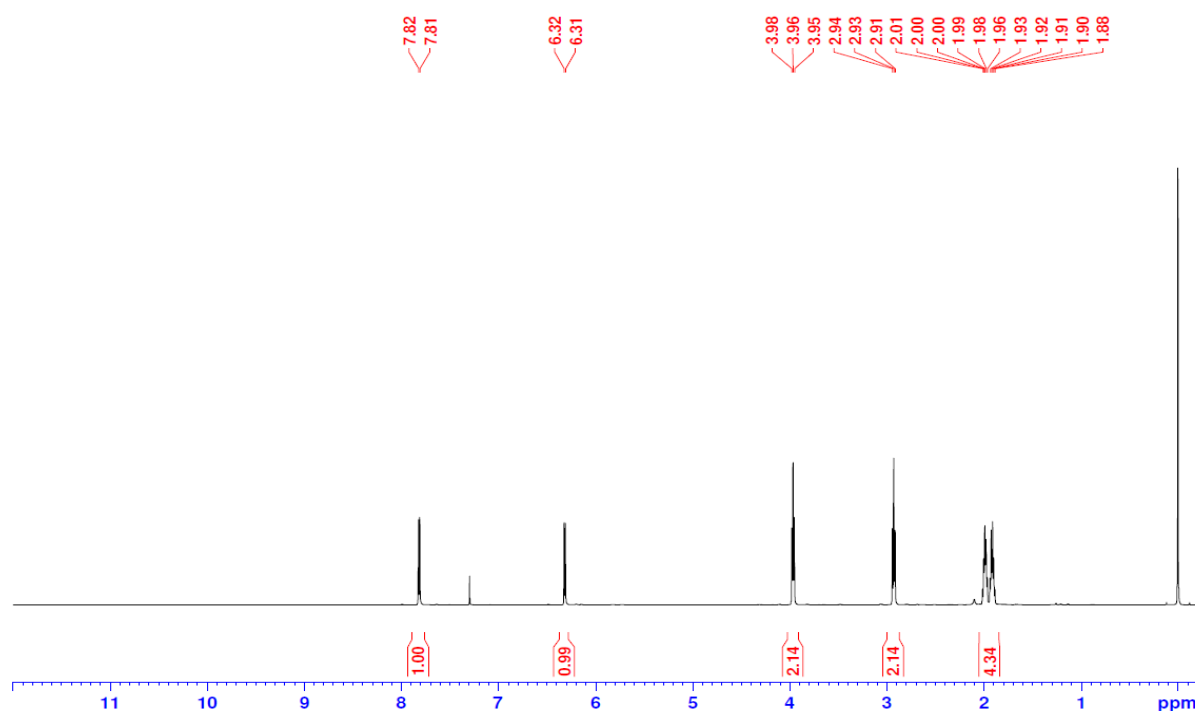

$^{13}\text{C}$  NMR (100.6 MHz,  $\text{CDCl}_3$ ):  $\delta_{\text{C}}$  = 19.12, 21.86, 31.68, 42.55, 112.25, 152.48, 160.33, 162.31.

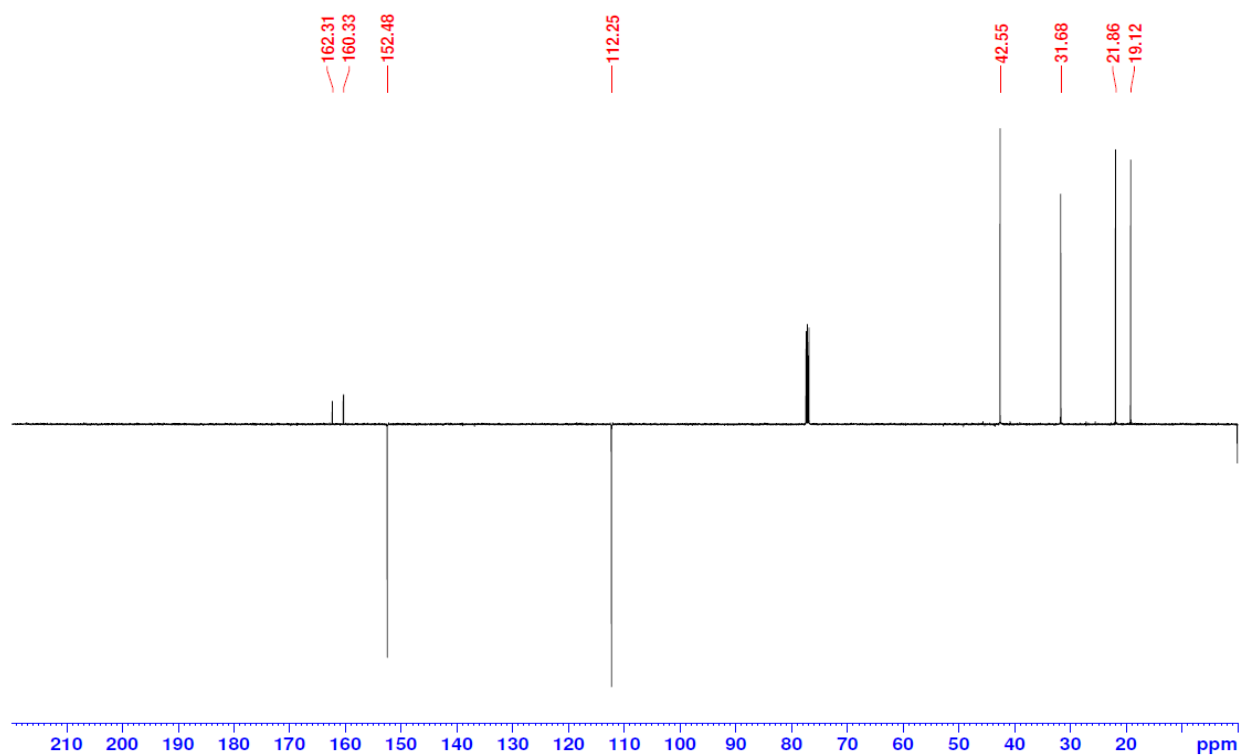

HPLC-MS characterization: The following retention time and molecular weight were determined: **12**: {RT= 7.67, m/z = 151 [M + H]<sup>+</sup>}.

RT: 0.00 - 24.99

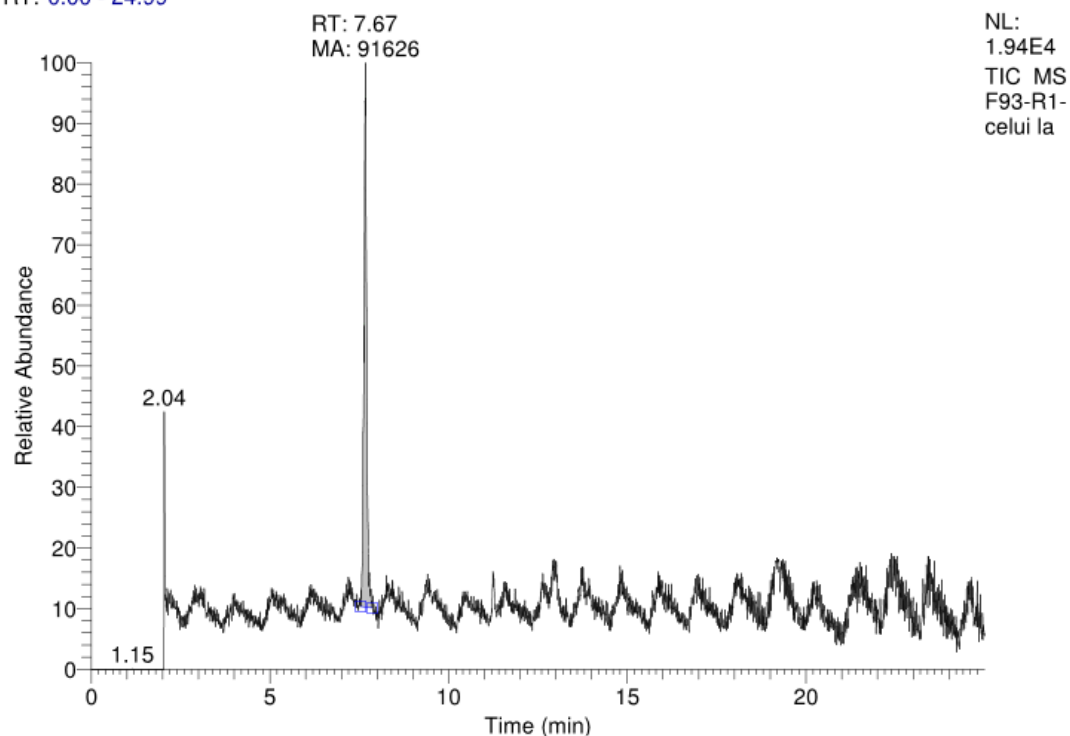

F93-R1- celui la #1019-1051 RT: 7.53-7.77 AV: 33 NL: 4.98E3

T: ITMS + c ESI Full ms [50.00-2000.00]

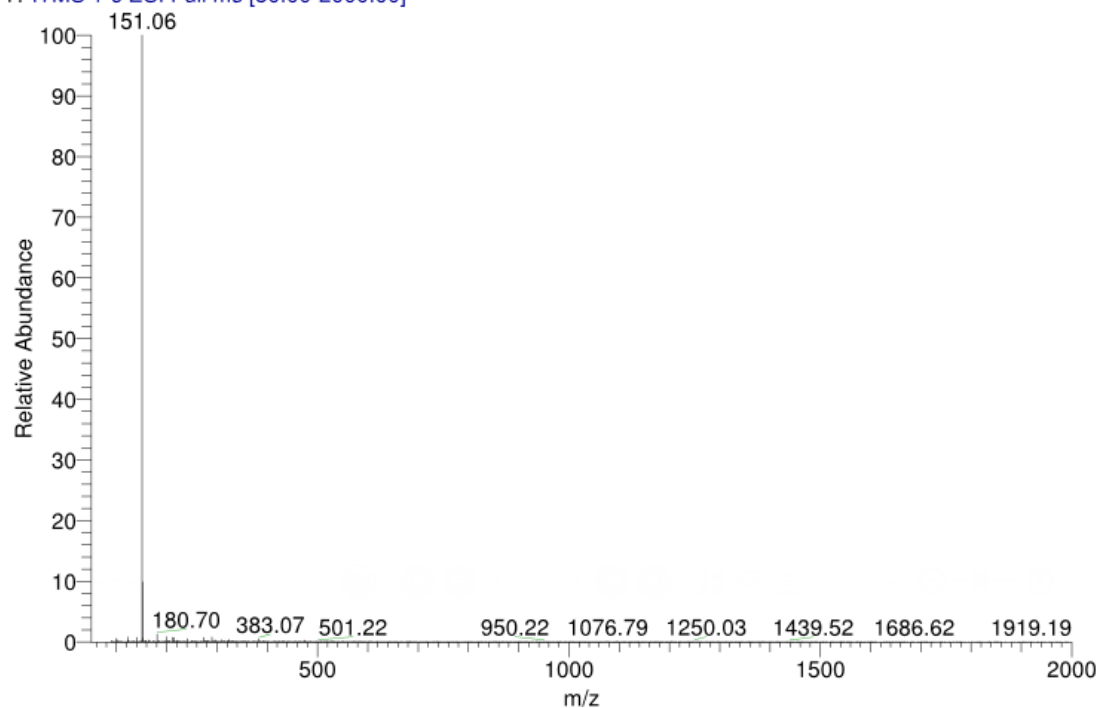

**7,8,9,10-Tetrahydropyrimido[1,2-*a*]azepin-4(6*H*)-one (13):**

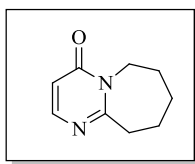

1,4-Octahydromethanoazepino[2,1-*b*]quinazolin-12(6*H*)-one (**6**) (0.1 mmol) was dissolved in MeOH (6 mL) at 130 °C, pressure = 10 bar, flow rate = 0.5 mL min<sup>-1</sup>. The solution fed into the reactor passed through the heated reactor coil within a residence time of 10 min and the flow output was collected. The MeOH was removed by evaporation and the resulting product **13** was analysed and obtained in a good yield and with high purity (**13**, yield = 94%). Spectroscopic data are in agreement with the literature data [5].

<sup>1</sup>H NMR (400.1 MHz, CDCl<sub>3</sub>) δ<sub>H</sub>: 1.73–1.85 (m, 6H), 2.97–3.00 (m, 2H, CH<sub>2</sub>), 4.30–4.33 (t, 2H, CH<sub>2</sub> *J* = 6.5 Hz), 6.31 (d, 1H, CH, *J* = 6.5 Hz), 7.74 (d, 1H, CH, *J* = 6.5 Hz).

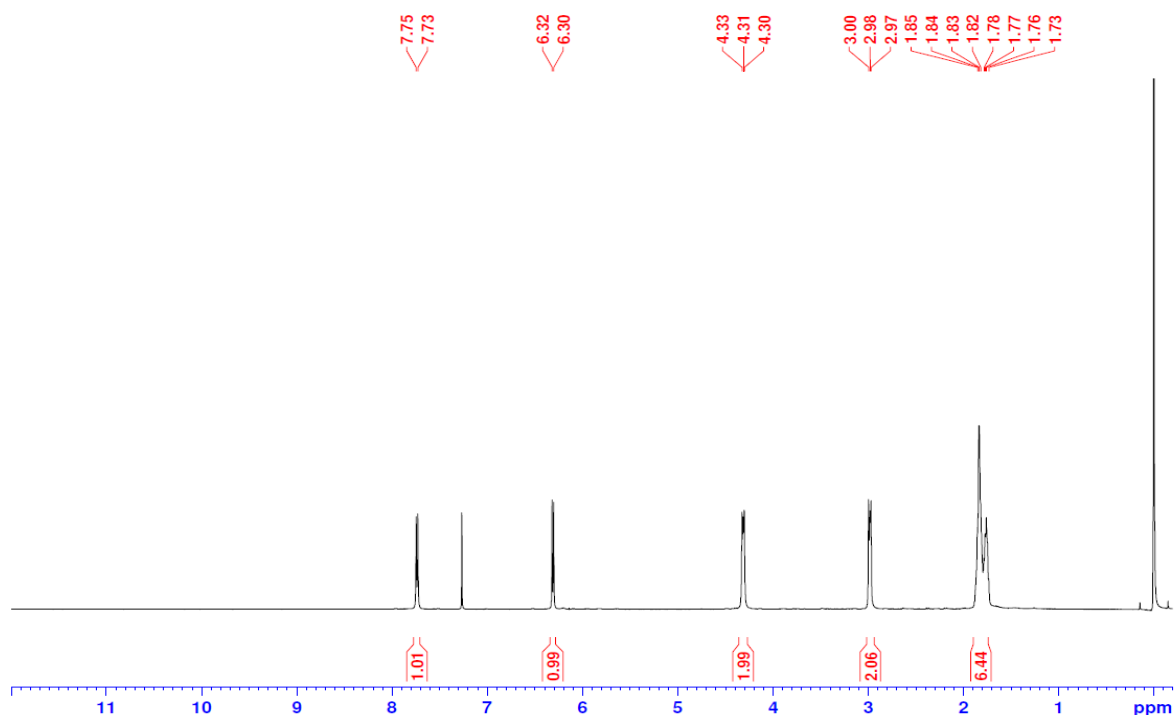

$^{13}\text{C}$  NMR (100.6 MHz,  $\text{CDCl}_3$ ):  $\delta_{\text{C}}$  = 24.71, 27.27, 29.70, 37.47, 42.70, 112.96, 152.34, 162.04, 165.24.

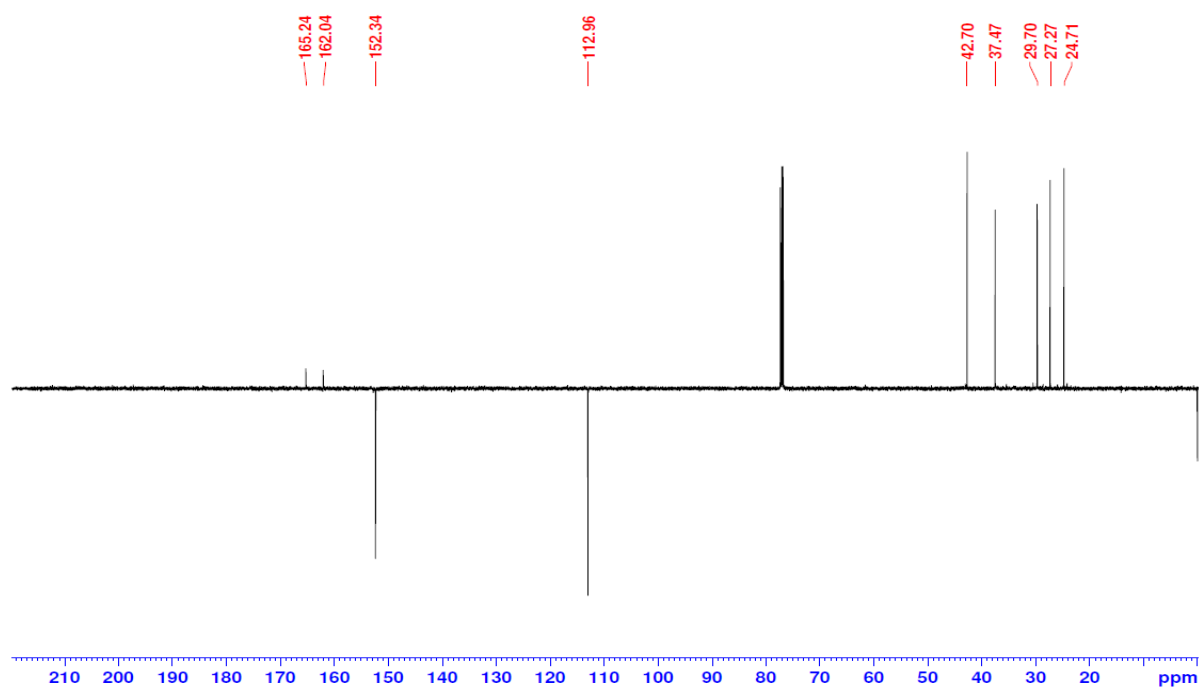

HPLC-MS characterization: The following retention time and molecular weight were determined: **13**: {RT= 11.66, m/z = 165 [M + H]<sup>+</sup>}.

RT: 0.00 - 24.99

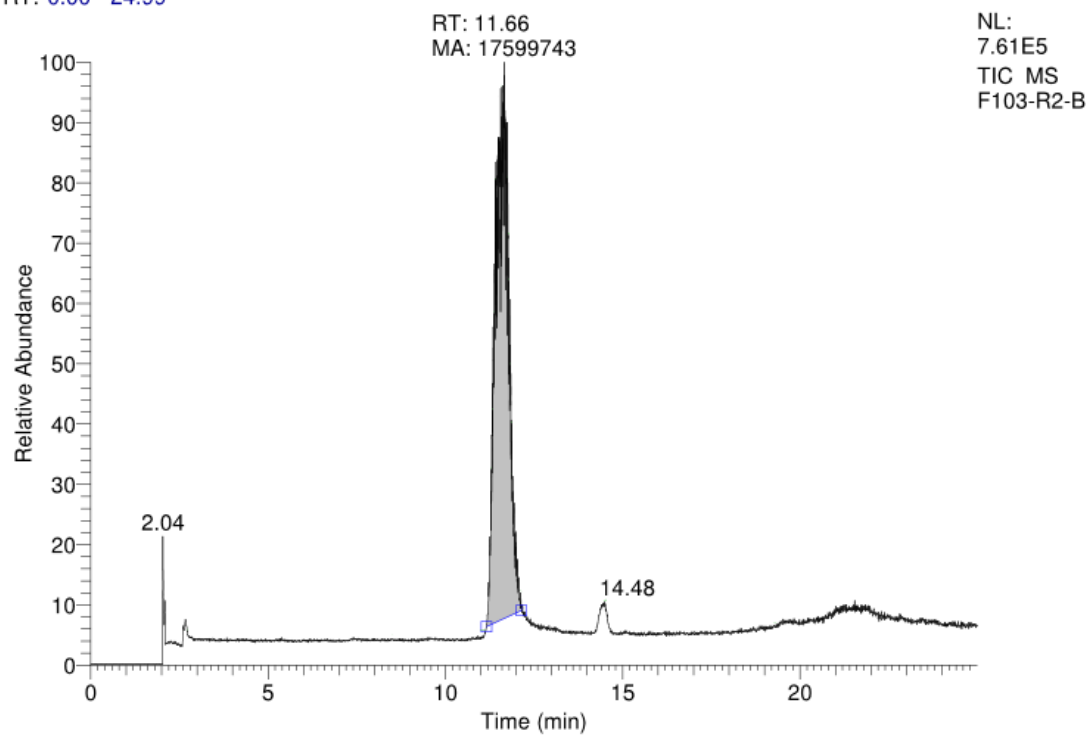

F103-R2-B #1584 RT: 11.51 AV: 1 NL: 5.68E5  
T: ITMS + c ESI Full ms [50.00-2000.00]

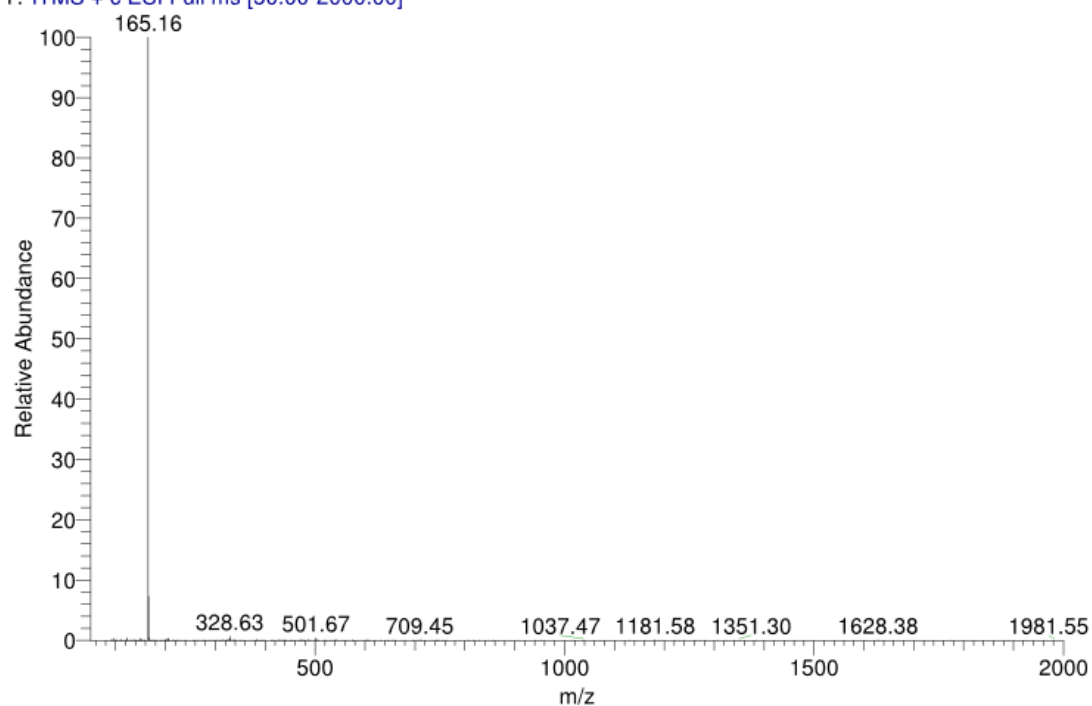

### 2,3-Dihydro-3- phenyl-2-thioxopyrimidin-4(1*H*)-one (**14**)

Synthesized from the following starting materials **7** (Method A), **8a** (Method B) and **8b** (Method C):

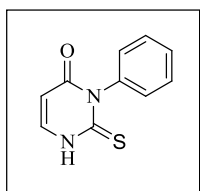

#### Method A

*diexo*-3-Phenyl-2-thioxohexahydro-5,8-methanoquinazolin-4(1*H*)-one (**7**, 0.1 mmol) was dissolved in MeCN (10 mL). The system temperature was set to 210 °C, the pressure to 10 bar and the flow rate to 0.5 mL min<sup>-1</sup>. The solution loaded into the reactor passed through the heated reactor coil within a residence time of 15 min and the flow output was collected. The solvent was removed by evaporation and the resulting product **14** was analysed by means of HPLC-MS and <sup>1</sup>H NMR and obtained in a high yield and with high purity (**14**, m.p. 247-249 °C, yield = 96%).

#### Method B

The synthesis was performed at 220 °C with a flow rate of 0.5 mL min<sup>-1</sup> corresponding to a residence time of 10 min. Di-*endo*-3-phenyl-2-thioxohexahydro-5,8-methanoquinazolin-4(1*H*)-one (**8a**, 0.1mmol) was dissolved in MeCN (10 mL). Product **14** was isolated by applying the same procedure used above (**14**, m.p. 247–249 °C, yield = 96%).

#### Method C

The system temperature was increased to 250 °C, while using the same flow rate (0.5 mL min<sup>-1</sup>). Di-*endo*-3-Phenyl-2-thioxohexahydro-5,8-ethanoquinazolin-4(1*H*)-one (**8b**) (0.01 mmol) was introduced into the flow reactor in a solution of MeCN (15 mL). The solution fed into the reactor passed through the heated reactor coil within a residence time of 30 min and the flow output was collected and analysed. The solvent was removed by evaporation. The HPLC-MS chromatogram indicates that compound **8b** underwent thermal decomposition with only a moderate conversion of 36% to product **14**. The following retention times and molecular weights were determined: **8b**: {RT= 22.60, m/z = 285 [M + H]<sup>+</sup>} **14**: {RT= 14.83, m/z = 205 [M + H]<sup>+</sup>} Conversion: 36%.

RT: 0.00 - 24.99

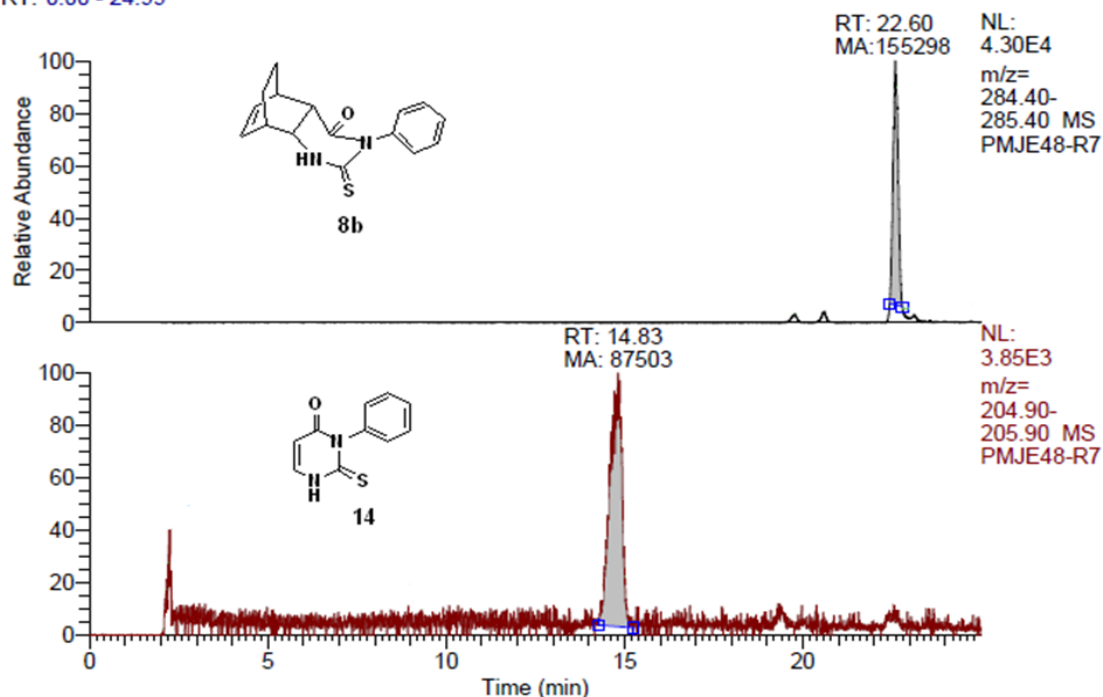

PMJE48-R7 #2081 RT: 14.86 AV: 1 NL: 3.25E3  
 T: ITMS + c ESI Full ms [50.00-2000.00]

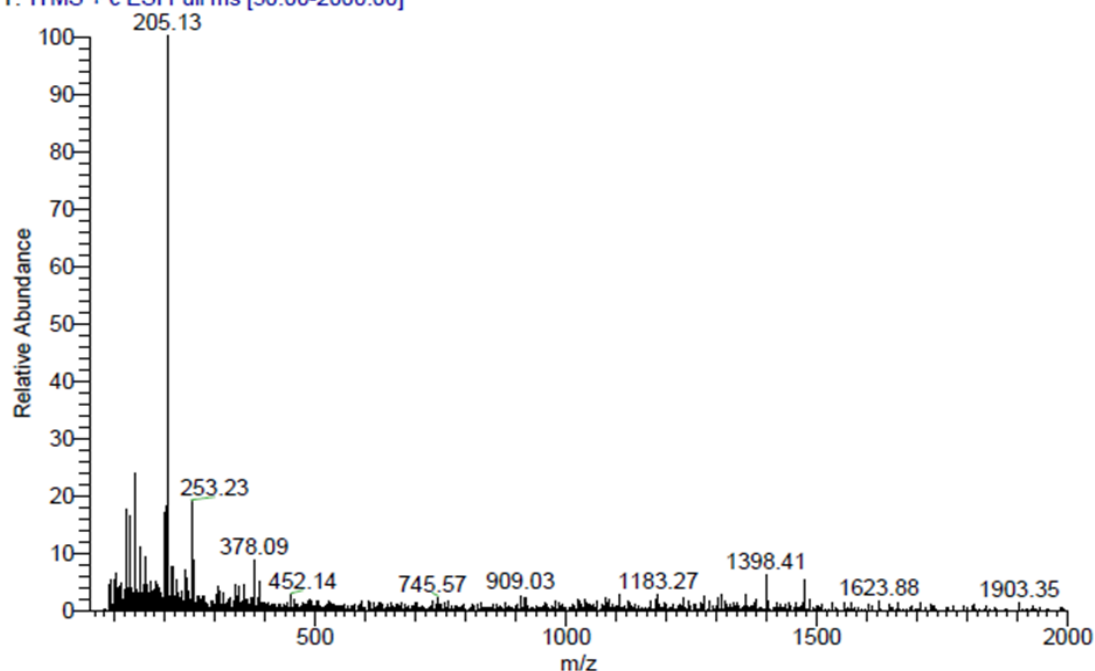

The processed product mixture leaving the flow system was subsequently loaded into a short silica chromatography column and eluted with a mixture of MeOH/toluene (1:1). The title compound was isolated as off-white crystalline material (**14**, m.p. 247-249 °C, yield = 30%). Spectroscopic data are in agreement with literature data [4,6].

$^1\text{H}$  NMR (400.1 MHz,  $\text{CDCl}_3$ )  $\delta_{\text{H}}$ : 6.12 (d, 1H, CH,  $J = 7.6$  Hz), 7.14-7.23 (m, 3H), 7.46-7.55 (m, 3H), 10.00 (s, 1H, NH).

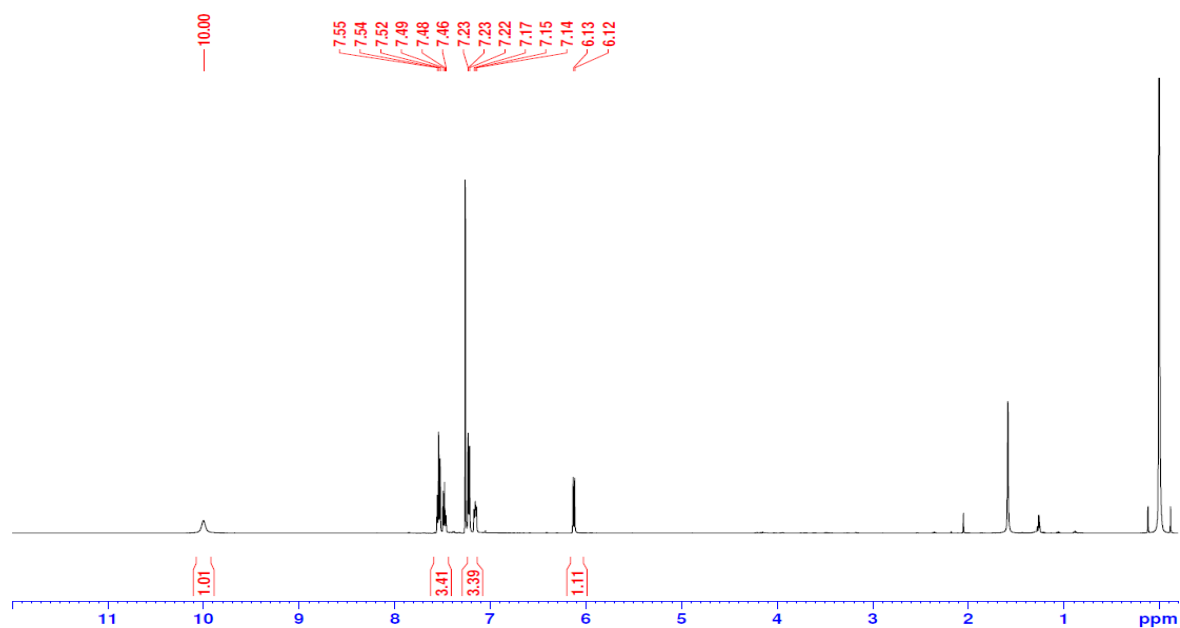

$^{13}\text{C}$  NMR (100.6 MHz,  $\text{CDCl}_3$ ):  $\delta_{\text{C}}$  = 106.28, 127.92, 129.19, 129.75, 138.34, 138.78, 160.61, 178.43.

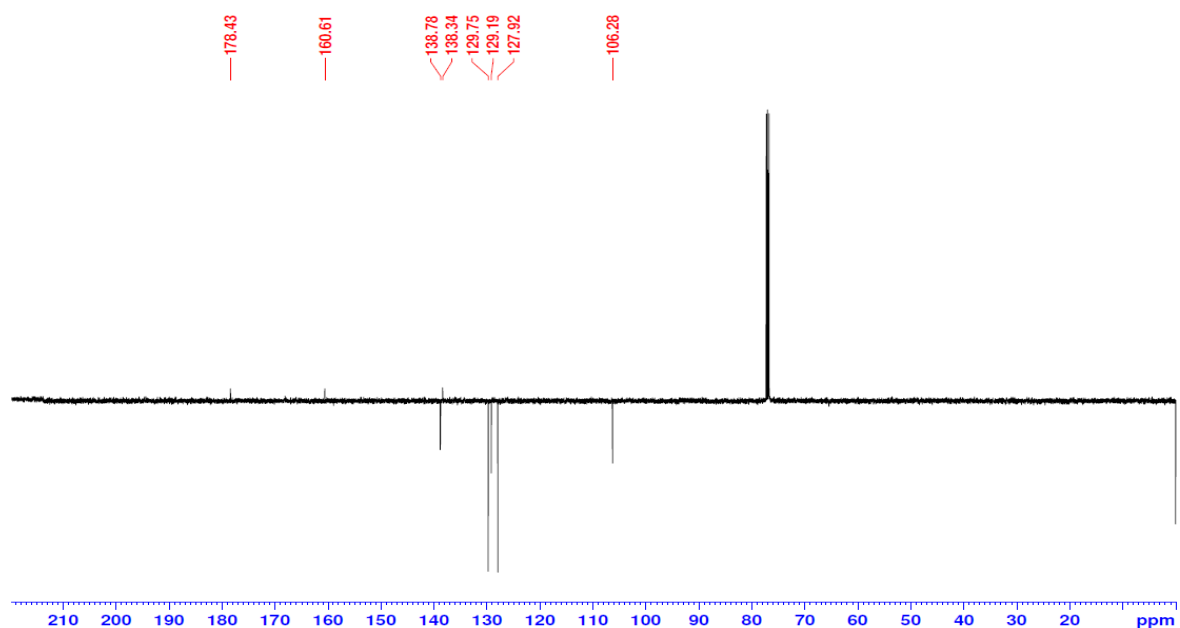

HPLC-MS characterization: The following retention time and molecular weight were determined: **14**: {RT= 13.78, m/z = 205 [M + H]<sup>+</sup>}.

RT: 0.00 - 15.20

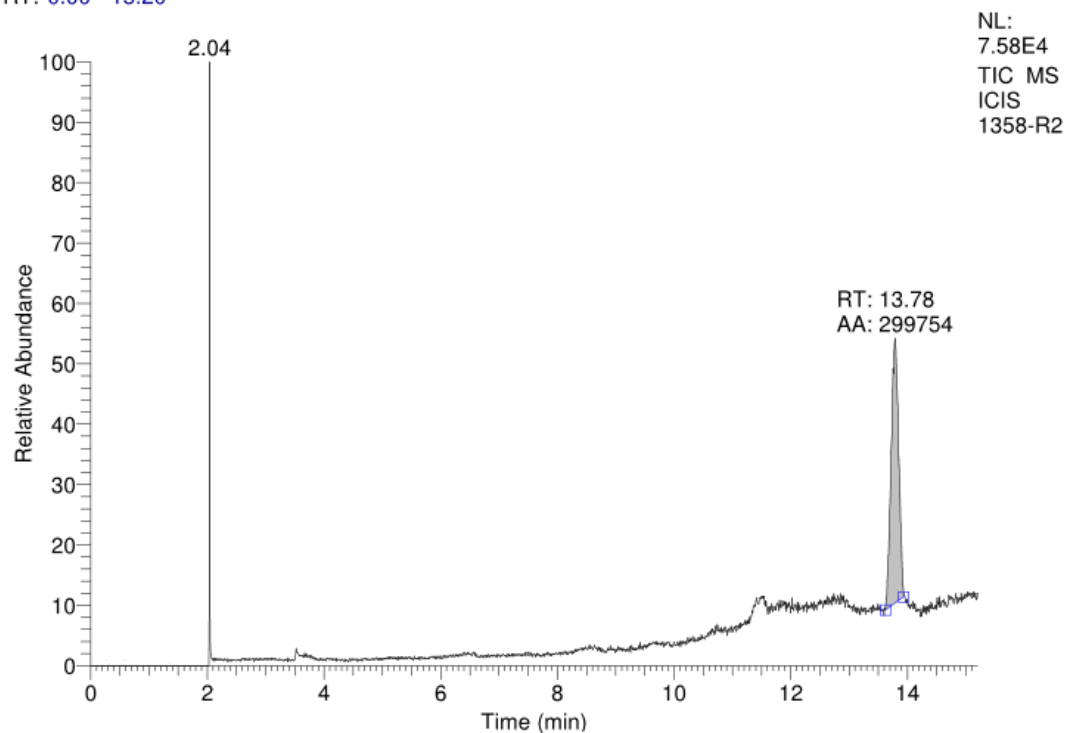

1358-R2 #1861 RT: 13.77 AV: 1 NL: 5.80E3  
T: ITMS + c ESI Full ms [50.00-2000.00]

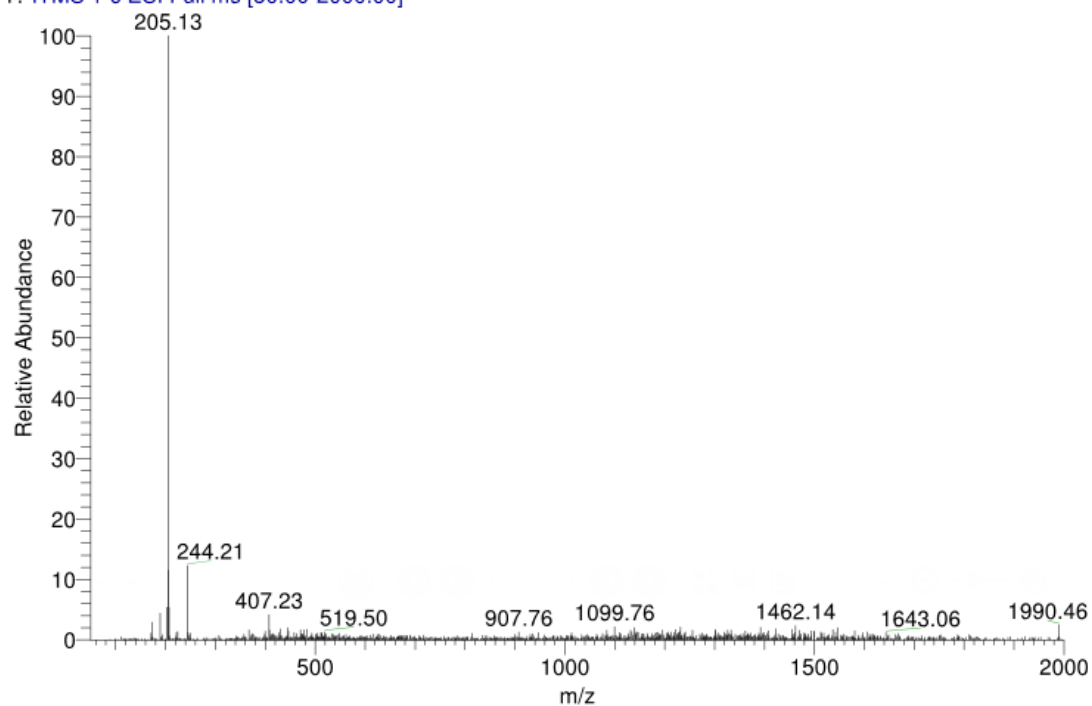

### 1.6. Desulfurisation reaction of **8b**, synthesis of *diendo*-3-phenyl-4a,5,8,8a-tetrahydro-5,8-ethanoquinazolin-4(3*H*)-one (**15b**)

*diendo*-3-Phenyl-2-thioxohexahydro-5,8-ethanoquinazolin-4(1*H*)-one (**8b**, 0.01 mmol) was dissolved in a mixture of EtOH/water (2:1) (15 mL) at 250 °C, pressure = 10 bar, flow rate = 0.5 mL min<sup>-1</sup>. The solution fed into the reactor passed through the heated reactor coil within a residence time of 30 min and the flow output was collected. Solvents were removed by evaporation, and the product residue was analysed. Product **15b** was obtained in a good yield (**15b**, m.p. 247-249, yield = 90%).

<sup>1</sup>H NMR (400.1 MHz, CDCl<sub>3</sub>)  $\delta$ <sub>H</sub>: 1.21-1.51(m, 4H, CH<sub>2</sub>CH<sub>2</sub>), 2.83-2.97 (m, 3H, H-4a, H-5, H-8), 3.93 (d, 1H, H-8a, *J* = 8.5 Hz), 6.24-6.26 (t, *J* = 7.17, 1H, H-6), 6.79-7.00 (m, 6H, Ar, H-5), 7.81 (s, 1H, H-2).

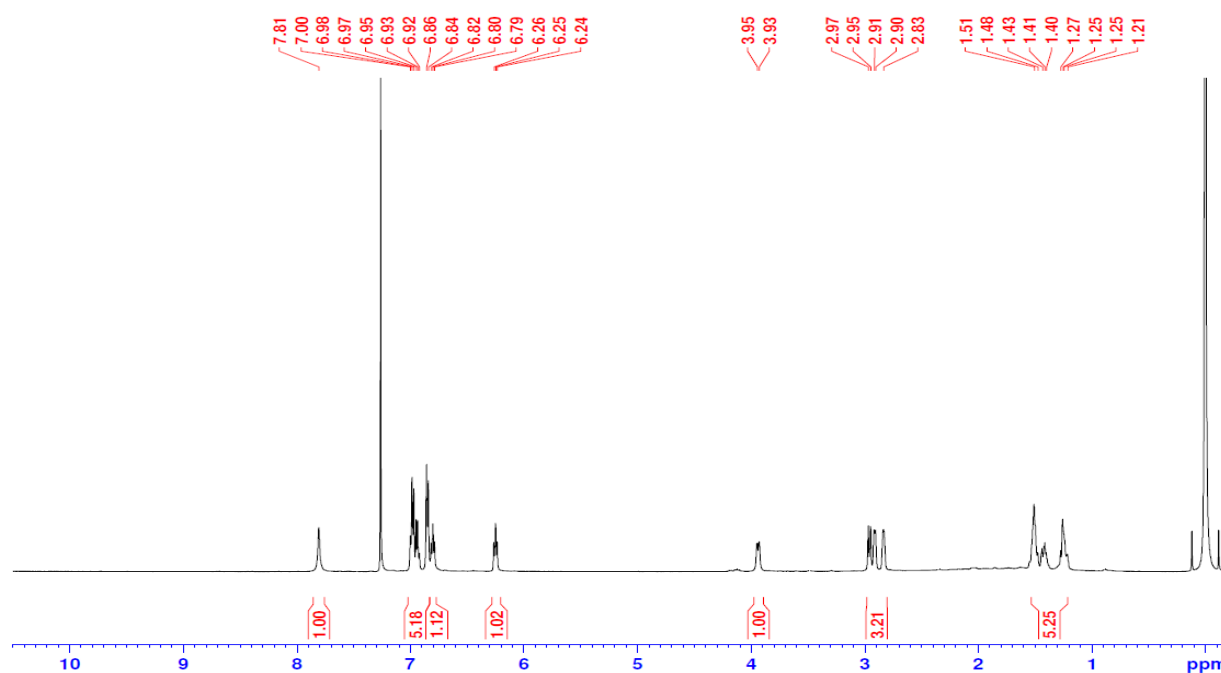

$^{13}\text{C}$  NMR (100.6 MHz,  $\text{CDCl}_3$ ):  $\delta_{\text{C}}$  = 22.54, 24.54, 32.38, 35.34, 54.43, 62.63, 118.18, 125.13, 125.86, 129.23, 138.21, 139.28, 153.27, 178.26.

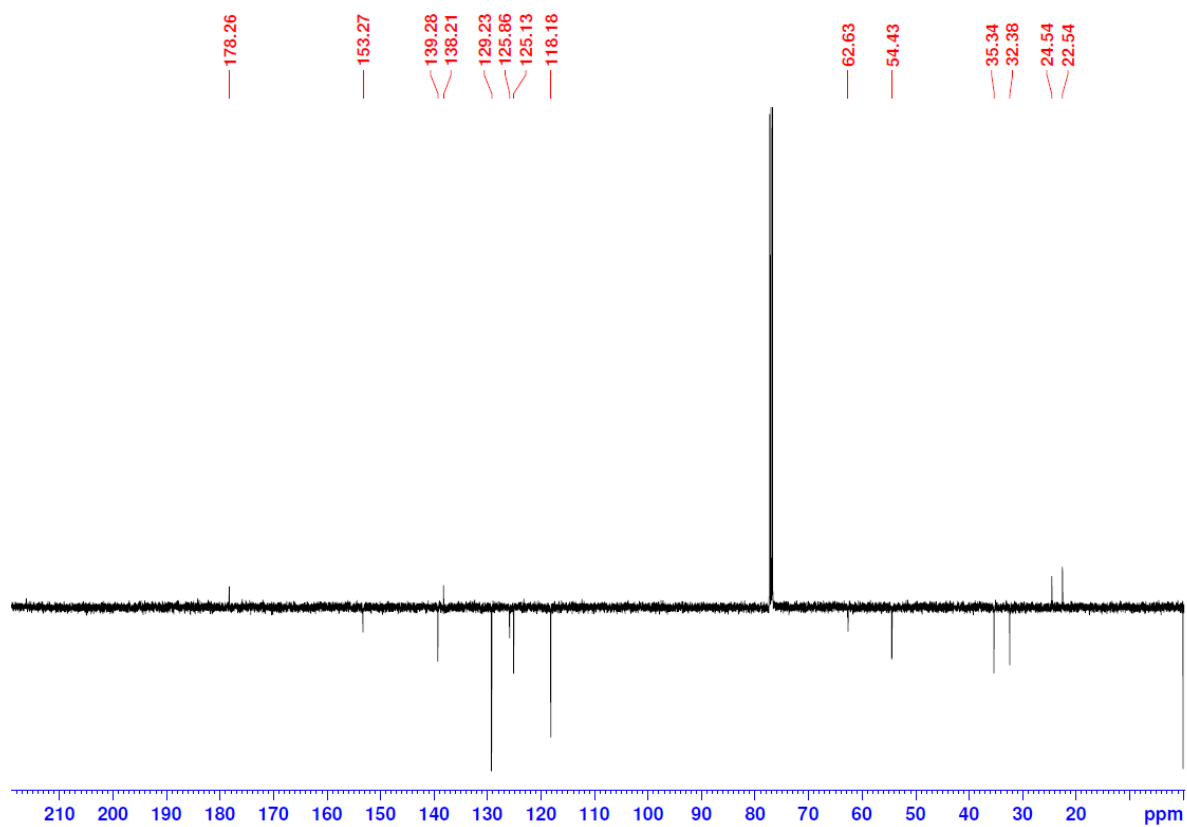

HPLC-MS characterization: The following retention time and molecular weight were determined: **15b**: {RT= 13.63, m/z = 253 [M + H]<sup>+</sup>}.

RT: 0.00 - 22.00

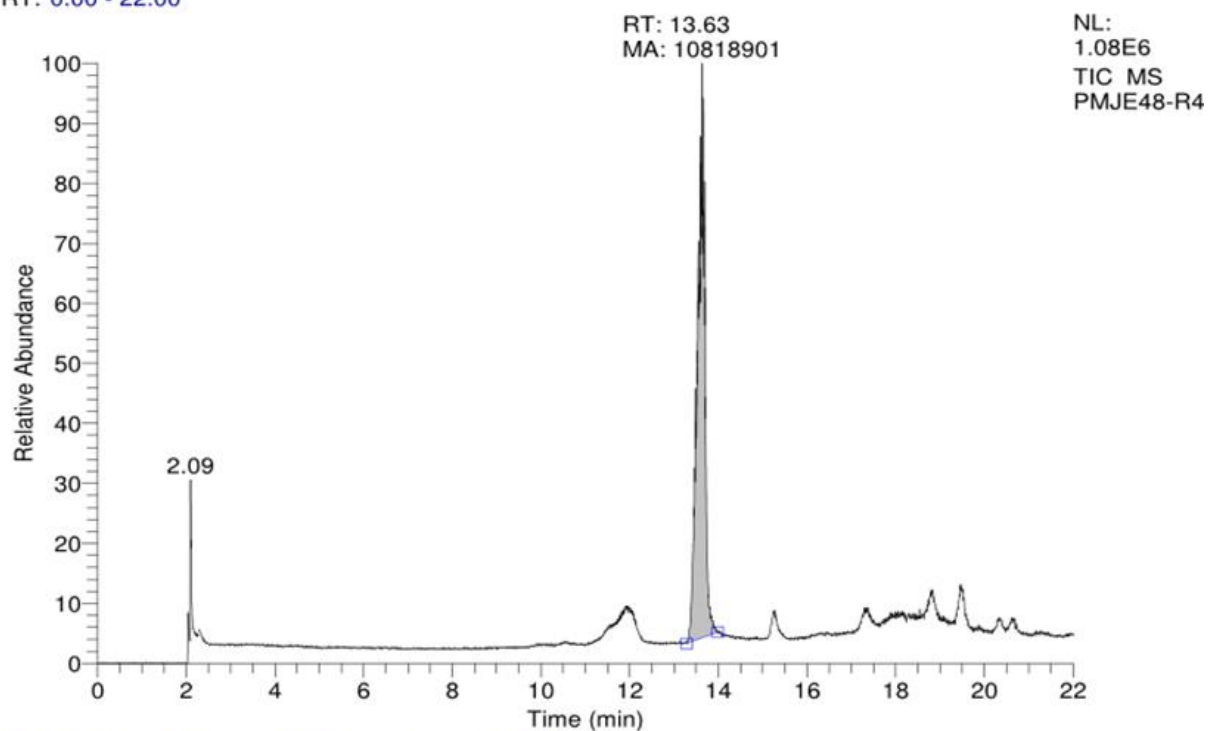

PMJE48-R4 #1936 RT: 13.56 AV: 1 NL: 4.95E5  
T: ITMS + c ESI Full ms [50.00-2000.00]

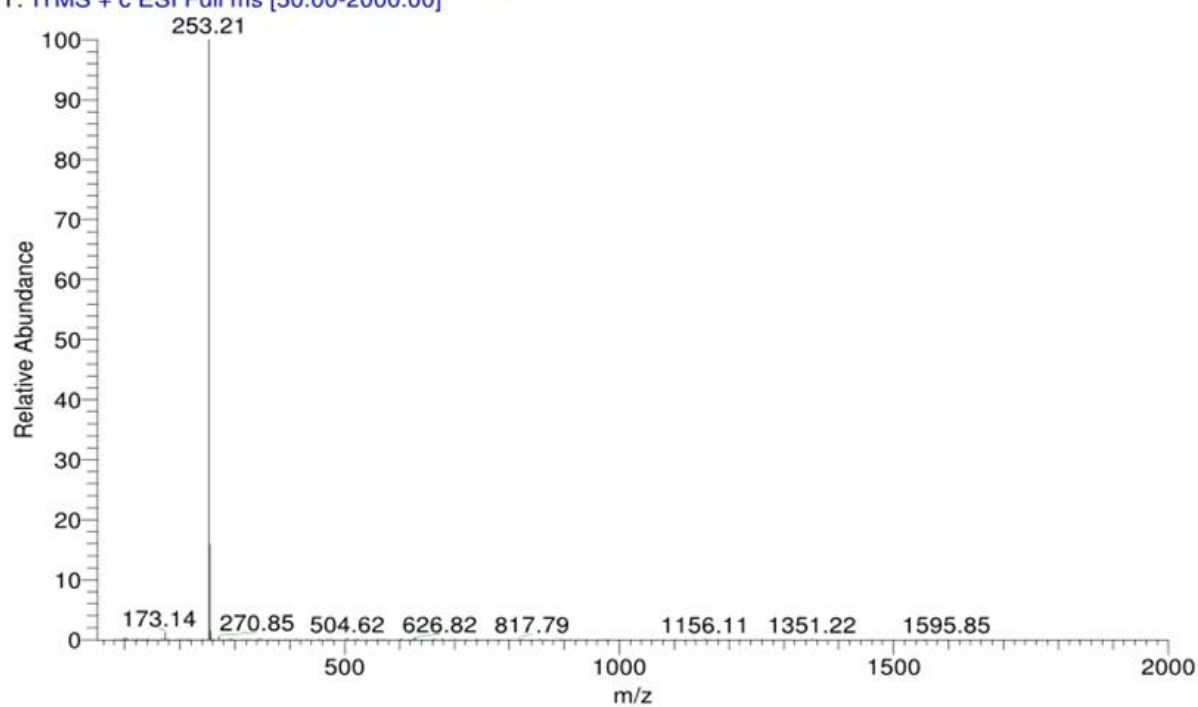

### 1.6.1 Alternative batch synthesis of di-*endo*-3-phenyl-4a,5,8,8a-tetrahydro-5,8-ethanoquinazolin-4(3*H*)-one (15b)

The mixture of 3-aminobicyclo[2.2.2]oct-5-ene-carboxylic acid (1 mmol, 167 mg), triethylorthoformate (1.5 mmol, 222 mg), aniline (1.1 mmol, 108 mg) and acetic acid (0.2 mL) was subjected to microwave irradiation at 120 W at 80 °C for 20 min. After completion of the reaction, as monitored by TLC, 20% methanolic solution in water (10 mL) was added to get precipitation. Solid was filtered off and washed with water to get **15b**. The product was purified by column chromatography on silica gel eluted with toluene/methanol (4:1). Yield: (163 mg, 65%); light pink crystals; m.p. 247–249 °C; IR:  $\nu_{\text{C=O}}$  1703,  $\nu_{\text{C=N}}$  1599  $\text{cm}^{-1}$  in KBr;  $^1\text{H}$  NMR: 1.12-1.55(m, 4H,  $\text{CH}_2\text{CH}_2$ ), 2.80-3.05 (m, 3H, H-4a, H-5, H-8), 3.93 (m, 1H, H-8a), 6.24 (t,  $J = 7.17$ , 1H, H-6), 6.86-6.97 (m, 6H, Ar, H-5), 7.82 (s, 1H, H-2);  $^{13}\text{C}$  NMR: 22.92, 24.95, 32.78, 35.76, 54.76, 62.90, 118.58, 125.59, 126.32, 129.66, 138.53, 139.65, 153.74, 178.68.

### References

1. Csende, F.; Stájer, G.; Fülöp, F. In: Comprehensive Organic Synthesis, 2nd ed. Elsevier, Amsterdam, 2014, vol. 5, pp. 551-592.
2. Stájer, G.; Szabó, A. E.; Fülöp, F.; Bernáth, G.; Sohár, P. *Chem. Ber.* **1987**, *120*, 259-264. doi: 10.1002/cber.19871200302
3. Stájer, G.; Szabó, A. E.; Bernáth, G.; Sohár, P. *Synthesis* **1987**, 290-292. doi: 10.1055/s-1987-27922
4. Palkó, M.; Sohár, P.; Fülöp, F. *Molecules* **2011**, *16*, 7691-7705. doi: 10.3390/molecules16097691
5. Fülöp, F.; Palkó, M.; Bernáth, G.; Sohár, P. *Synth. Commun.* **1997**, *27*, 195-203. doi: 10.1080/00397919708005019
6. Stájer, G.; Szabó, A. E.; Pintye, J.; Bernáth, G.; Sohár, P. *J. Chem. Soc.-Perkin Trans. 1.* **1985**, 2483-2487. doi: 10.1039/p19850002483
7. Ötvös, S. B.; Mándity, I. M.; Fülöp, F. *ChemSusChem.* **2012**, *5*, 266-296. doi: 10.1002/cssc.201100332
